# Supplementary material for: Programmed co-delivery of platinum nanodrugs and gemcitabine by a clustered nanocarrier for precision chemotherapy for NSCLC tumors
Source: Royal Society of Chemistry journal article supplement (doi:10.1039/c9tb02055a), 2019-12-10
Supplement: c9tb02055a1.pdf [file c9tb02055a1.pdf]

## Supplementary Material

### Programmed co-delivery of platinum nanodrugs and Gemcitabine by clustered nanocarrier for precision chemotherapy

Huihui Shi<sup>a,b#</sup>, Ming Xu<sup>c,d#</sup>, Jianhua Zhu<sup>b</sup>, Yang Li<sup>b</sup>, Yuxia Zhang<sup>b</sup>,  
Zhiyu He<sup>e</sup>, Qunwei Xu<sup>b</sup>, Yimin Niu<sup>a\*</sup>, Yang Liu<sup>b\*</sup>

a. Department of Pharmacy, Zhongda hospital, School of Medicine, Southeast University, Nanjing 210009, China.

b. School of Pharmacy, Nanjing Medical University, Nanjing 211166, China.

c. Department of Occupational Disease Prevention, Jiangsu Provincial Center for Disease Control and Prevention, Nanjing 210009, Jiangsu, China.

d. School of Public Health, Nanjing Medical University, Nanjing 211166, Jiangsu, China.

e. Institute for NanoBioTechnology, Johns Hopkins University, Baltimore, MD 21218, USA.

Corresponding author:

\* E-mail: yangliunano@njmu.edu.cn. (Yang Liu)

\* E-mail: nym0125@163.com. (Yimin Niu)

# These authors contributed equally to this work.

---

## Contents:

- Figure S1. FT-IR spectrum of PEG-*b*-PZLL and PEG-*b*-PLL.
- Figure S2. <sup>1</sup>H NMR spectrum of (A) PEG-*b*-PZLL and (B) PEG-*b*-PLL
- Figure S3. FT-IR spectrum of OAPI and OPBLA.
- Figure S4. General synthetic route of the PEG-*b*-PLL block copolymer.
- Figure S5. General synthetic route of the PEG-*b*-P(LL-*g*-GEM) block copolymer.
- Figure S6. The general synthetic route of OAPI.
- Figure S7. *In vitro* cumulative Pt release from USPtNs.

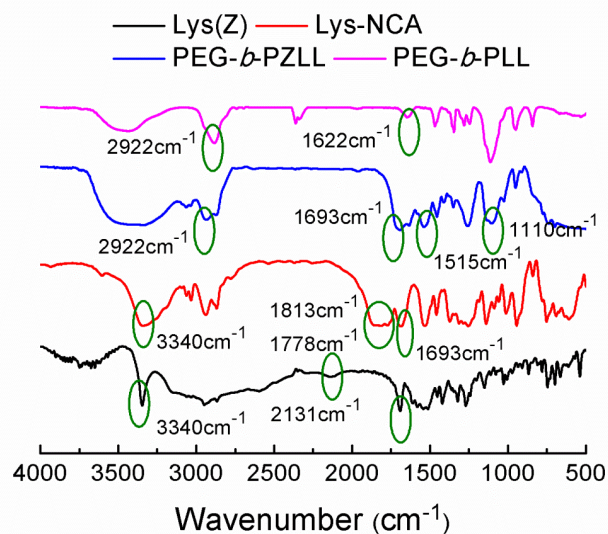

**Figure S1. FT-IR spectrum of PEG-*b*-PZLL and PEG-*b*-PLL.** In the Lys-NCA spectrum, the two peaks at  $1778\text{ cm}^{-1}$  and  $1813\text{ cm}^{-1}$  correspond to the carbonyl in NCA, while the hydroxyl (-OH) peak at  $2130\text{ cm}^{-1}$  has disappeared compared with the Lys(Z) spectrum, suggesting that Lys-NCA has successfully formed. In the PEG-*b*-PZLL spectrum, the peak at  $1110\text{ cm}^{-1}$  is assigned to the C-O of PEG, and the peak at  $2922\text{ cm}^{-1}$  corresponds to the C-H of PEG, while the carbonyl peaks at  $1778\text{ cm}^{-1}$  and  $1813\text{ cm}^{-1}$  have disappeared compared with the Lys-NCA spectrum, indicating that PEG-NH<sub>2</sub> successfully initiated the ring-opening polymerization with NCA. In the PEG-*b*-PLL spectrum, the benzyloxycarbonyl peak at  $1693\text{ cm}^{-1}$  has disappeared and an N-H peak at  $3489\text{ cm}^{-1}$  has appeared compared with the PEG-*b*-PZLL spectrum, indicating that debenylation has occurred.

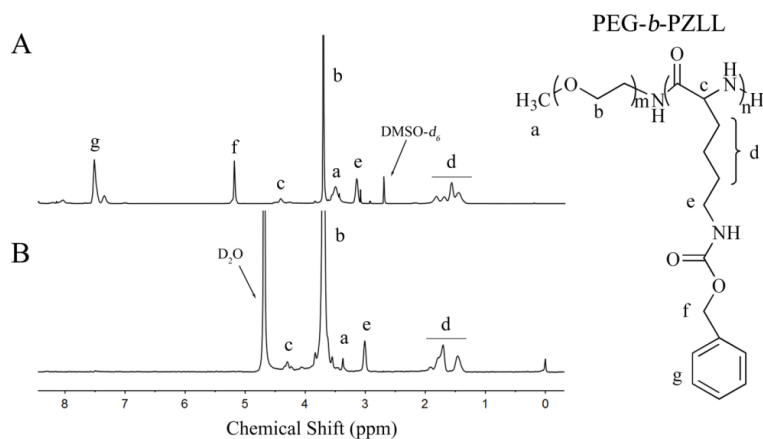

**Figure S2.  $^1\text{H}$  NMR spectrum of (A) PEG-*b*-PZLL and (B) PEG-*b*-PLL**, which is briefly analyzed as: Both the characteristic proton resonance peak of repeat units in the  $-\text{CH}_2\text{CH}_2-$  block of the PEG at  $\delta 3.94$  (b), and the characteristic peaks at  $\delta 7.3\sim\delta 7.4$  (g)、 $\delta 5.4$  (f)、 $\delta 4.6$  (c)、 $\delta 1.4\sim\delta 2.0$  (d) of Lys(Z) indicate that PEG- $\text{NH}_2$  triggered the ring-opening reaction and polymerization of Lys-NCA successfully. Comparing the PEG-*b*-PZLL and PEG-*b*-PLL  $^1\text{H}$  NMR spectra, the typical carbobenzyoxy group peaks at  $\delta 5.4$  and  $\delta 7.3\sim\delta 7.4$  ppm have disappeared, indicating that the PEG-*b*-PZLL deprotection process is complete. Comparing the signal intensities of the PLL methylene protons ( $-\text{CH}_2-\text{CH}_2-\text{CH}_2-$ ) with those of the methylene protons of PEG( $-\text{CH}_2-\text{CH}_2-\text{O}-$ ), we calculated the value of the polymerization degree of PLL as 10.

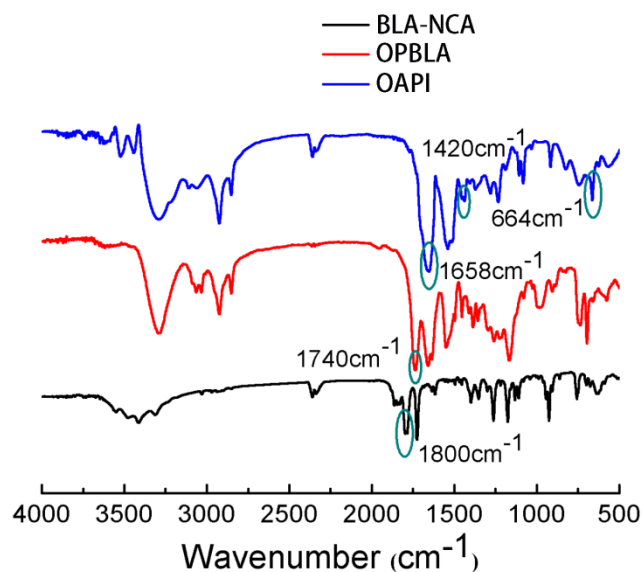

**Figure S3. FT-IR spectrum of OAPI and OPBLA.** In the BLA-NCA spectrum, the two peaks at  $1800\text{ cm}^{-1}$  and  $1730\text{ cm}^{-1}$  correspond to two carbonyl peaks in NCA. In the OPBLA spectrum, the corresponding NCA peaks have disappeared, and the characteristic absorption peaks of ester bonds have appeared at  $1740\text{ cm}^{-1}$ , indicating that the ring-opening reaction was successfully initiated. In the OAPI spectrum, the peak corresponding to ester bonds has disappeared, while the  $\text{CH}_2$  characteristic peak has appeared at  $1420\text{ cm}^{-1}$ , indicating that the amido bond was formed.

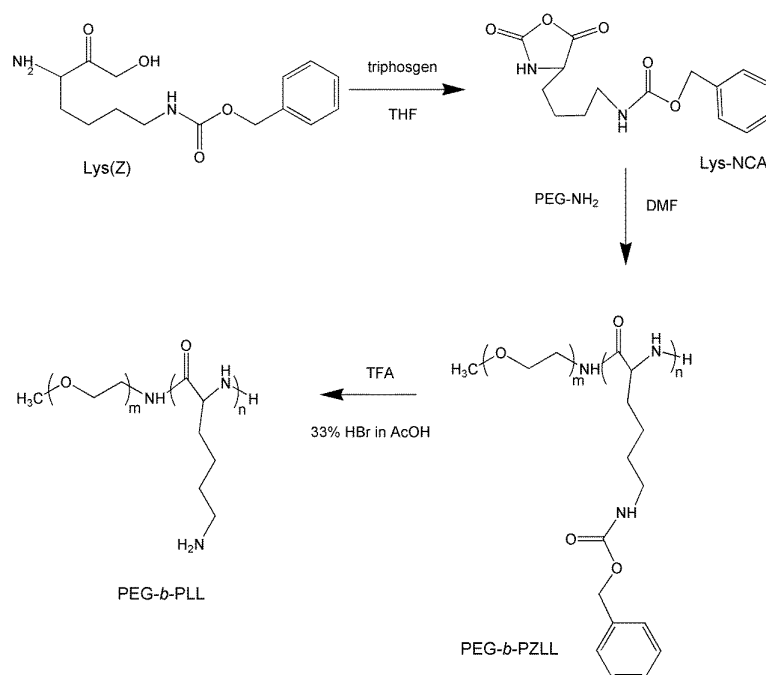

**Figure S4. General synthetic route of the PEG-*b*-PLL block copolymer.**

PEG-*b*-PLL was synthesized using PEG-NH<sub>2</sub> as an initiator to trigger the ring-opening polymerization of Lys-NCA, followed by the deprotection of the benzyloxycarbonyl groups.

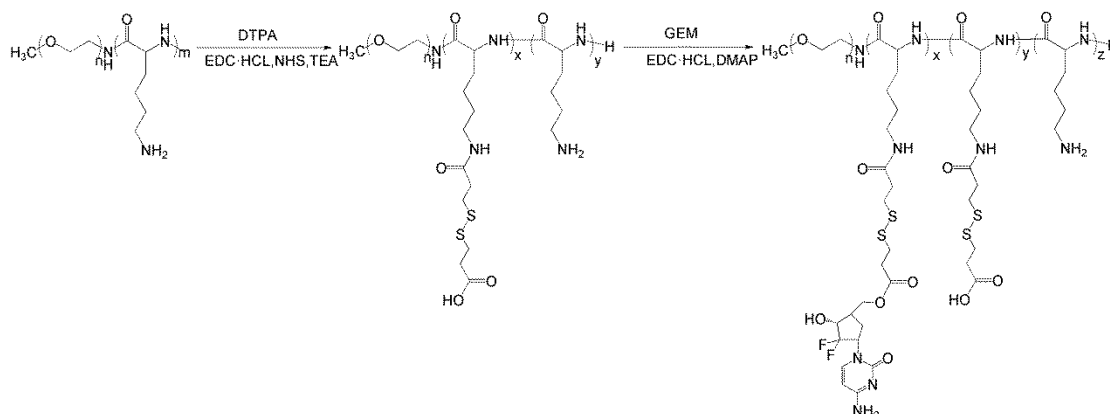

**Figure S5. General synthetic route of the PEG-*b*-P(LL-*g*-GEM) block copolymer.** 3,3'-Dithiodipropionic acid (DTPA) was conjugated to the amino groups of the PEG-*b*-PLL, followed with coupled Gemcitabine to obtain PEG-*b*-P(LL-*g*-GEM) block copolymer.

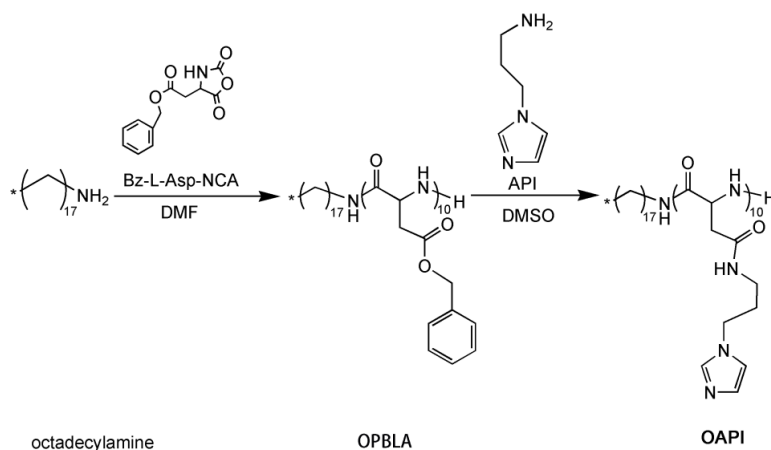

octadecylamine

OPBLA

OAPI

**Figure S6. The general synthetic route of OAPI.** The OPBLA polymers were synthesized by ring opening polymerization and then OAPI was obtained via aminolysis of the OPBLA with 1-(3-aminopropyl)imidazole (API).

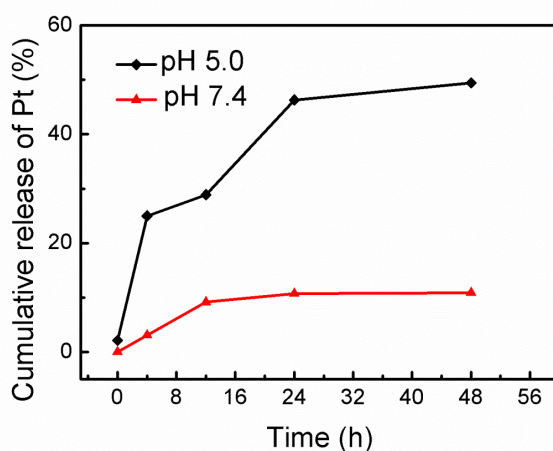

**Figure S7. *In vitro* cumulative Pt release from USPtNs.** The release behavior of Pt ions from USPtNs under different pH conditions (pH = 5.0, 7.4) was investigated by a dialysis method. A large amount of  $\text{Pt}^{2+}$  was found to be released from the USPtNs at pH 5.0, while the USPtNs remained relatively stable in neutral condition. The Pt concentrations were measured by ICP-MS (Perkin Elmer, Waltham, MA, USA).
